# Supplementary material for: Pattern dynamics and stochasticity of the brain rhythms
Source: PubMed Central journal article supplement — Proc Natl Acad Sci U S A. 2023 Mar 28;120(14):e2218245120. doi: 10.1073/pnas.2218245120 (PMC10083604; doi:10.1073/pnas.2218245120), 2023-03-28
Supplement: pnas.2218245120.sapp.pdf [file pnas.2218245120.sapp.pdf]

# PNAS

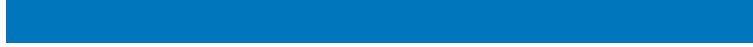

## Supporting Information for

### Pattern dynamics and stochasticity of the brain rhythms

C. Hoffman, J. Cheng, D. Ji, Y. Dabaghian

Y. Dabaghian.

E-mail: [Yuri.A.Dabaghian@uth.tmc.edu](mailto:Yuri.A.Dabaghian@uth.tmc.edu)

**This PDF file includes:**

Figs. S1 to S5



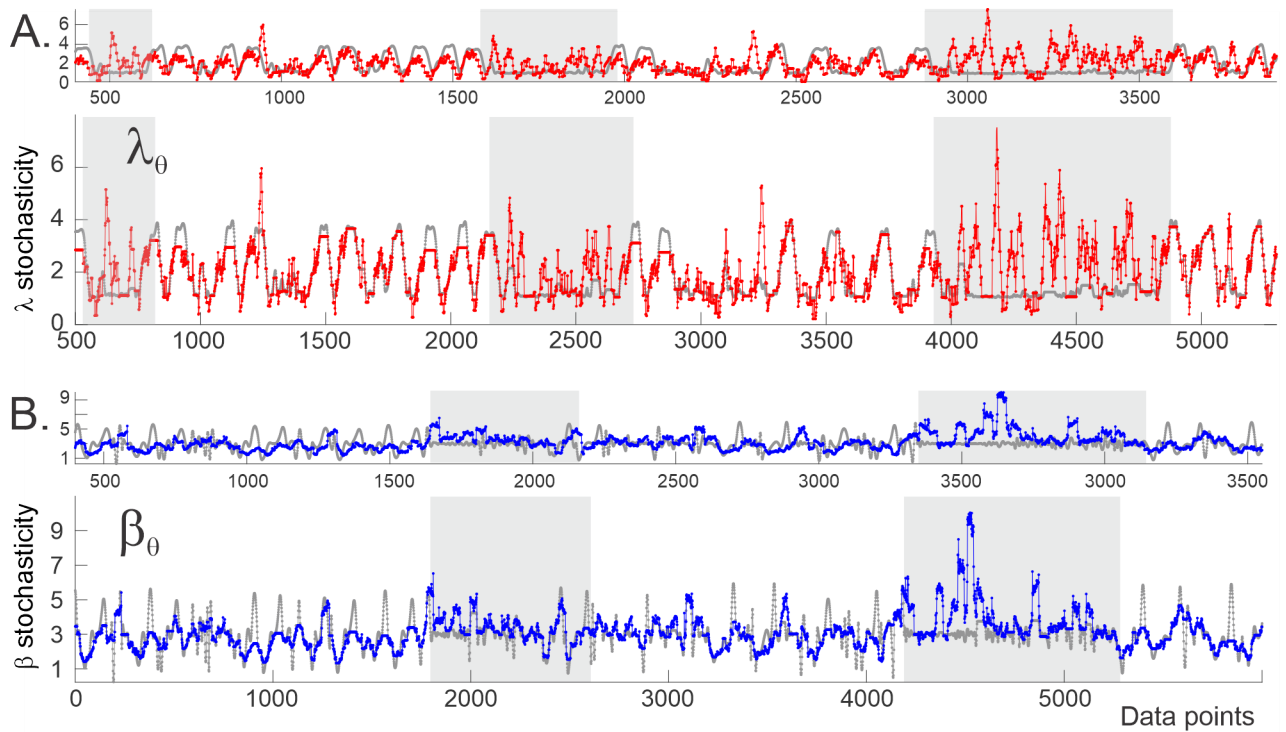

**Fig. S2. Matching waves using DTW.** **A.** Top panels show the original shapes of the speed ( $s(t)$ , gray trace) and the  $\theta$ -wave's Kolmogorov stochasticity score ( $\lambda_\theta(t)$ , red trace). Bottom panel shows same functions, matched up by a sequences of local DTW-stretches. Clearly, the speed and the  $\lambda_\theta$ -stochasticity have the same qualitative shape during active behavior, while during inactive moves (domains marked by light gray stripe) the connection is lost. **B.** Same analyses carried for the mouse's acceleration ( $a(t)$ , gray trace) and Arnold stochasticity parameter ( $\beta_\theta$ , blue trace). The net amount of stretch required to match speed and  $\lambda_\theta$  in this case (including the inactivity periods) is 26%, while the net stretch matching  $\beta_\theta$  and the acceleration is  $\sim 18\%$ .

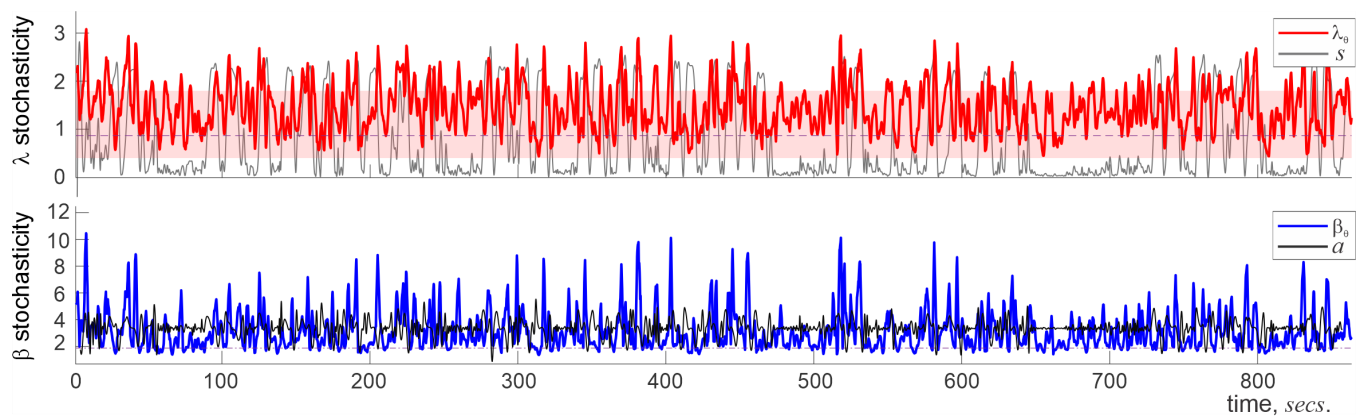

**Fig. S3. Aperiodic component of the  $\theta$ -wave.** **A.** The Kolmogorov stochasticity score computed for the patterns of the  $\theta$ -wave's arrhythmicity  $\xi_{\theta}(t)$  (red trace). In contrast with the original  $\theta$ -wave's stochasticity scores,  $\lambda_{\theta}$ , the  $\lambda_{\xi}$ -scores are higher, wider-distributed, but show no coupling to the speed,  $s(t)$  (gray line), and does not reflect changes in the physiological state. **B.** The corresponding Arnold's stochasticity parameter  $\beta_{\xi}(t)$  (blue trace) is much higher than the original  $\beta_{\theta}(t)$  score, indicating strong cluttering patterns, but without coupling to the mouse's acceleration  $a(t)$  (dark gray trace).

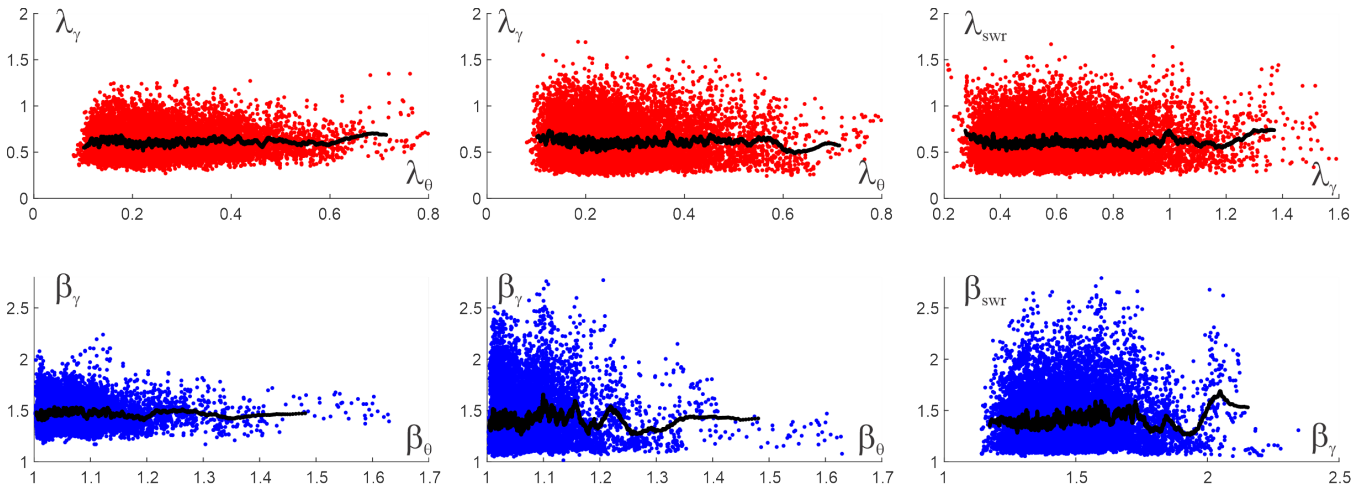

**Fig. S4. Coupling between stochasticity parameters of different waves.** **A.** The geometric layout of points with coordinates  $(\lambda_\theta, \lambda_\gamma)$ ,  $(\lambda_\theta, \lambda_{re})$  and  $(\lambda_\gamma, \lambda_{re})$  shows that a given  $\lambda$ -value produced by one wave may pair with any  $\lambda$ -value that another wave is capable of producing, i.e., wave patterns deviate from their respective means largely independently from each other. Correspondingly, the locally averaged scores  $\hat{\lambda}$  lay approximately horizontally, at the level of the corresponding means  $\langle \lambda_\theta \rangle$ ,  $\langle \lambda_\gamma \rangle$  and  $\langle \lambda_{re} \rangle$  (see Fig. 4D, Fig. 5B and Fig. 6B). **B.** The  $\beta$ -scores reveal similar lack of coupling between waves. Changes in locally averaged  $\hat{\beta}$ -values of one wave do not entrain consistent  $\hat{\beta}$ -changes of another wave. Thus, the (dis)orderliness of one wave does not enforce the (dis)orderliness of the other and the stochasticity dynamics discussed above provide independent characterizations of the LFP waves.

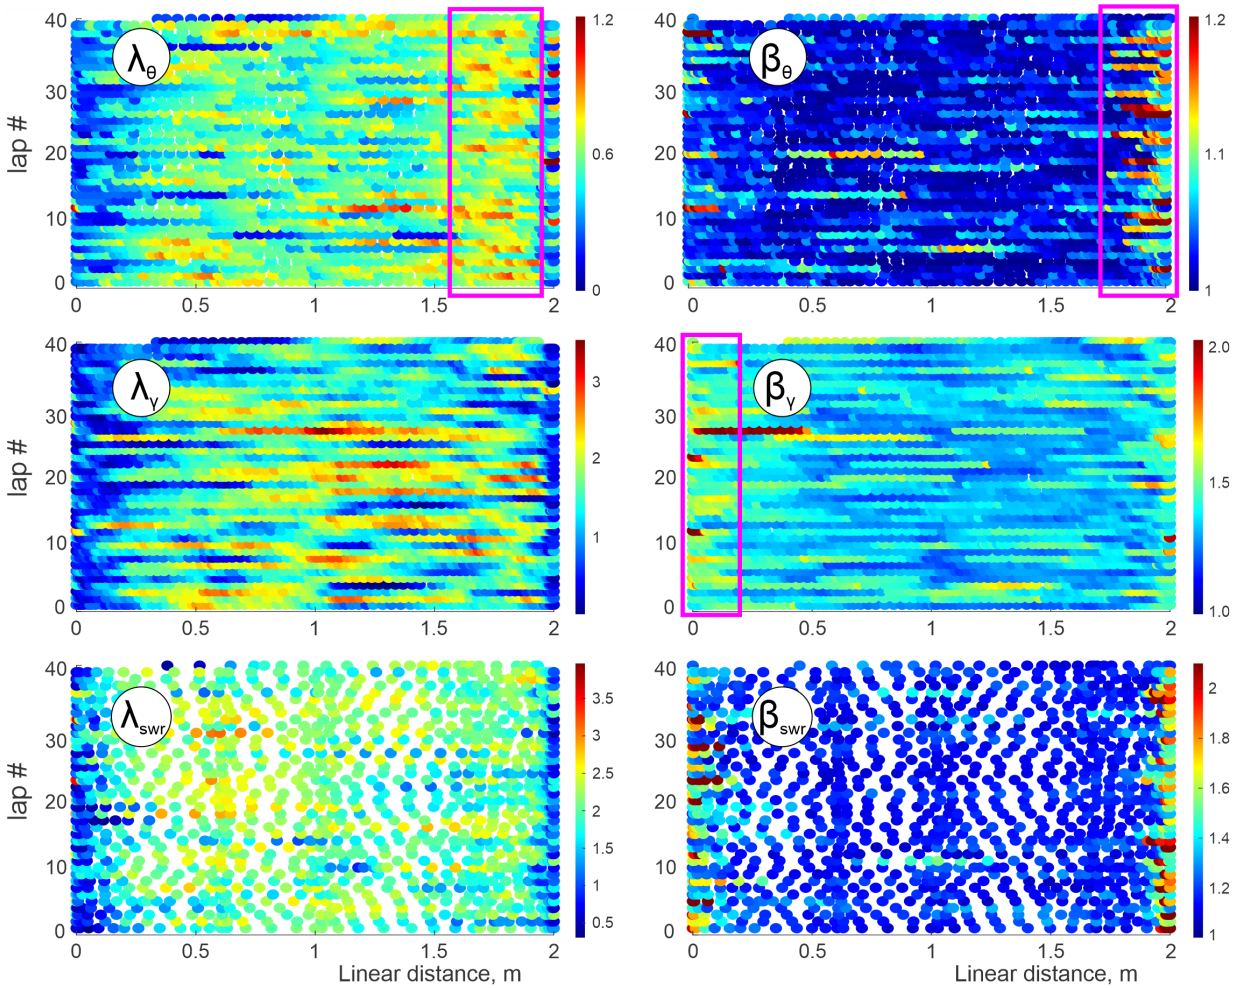

**Fig. S5. Linearized stochasticity maps.** The spatial distribution of the  $\lambda_*$ -scores along the track (left column) illustrates that the brainwave patterns tend to conform with the expected mean trends at the ends of the runway, i.e., in the vicinity of the food wells. In the middle of the track, the rhythms tend to wobble. Also note that  $\theta$ -wave exhibits wobbling upon leaving the right food well area (pink square). The  $\beta_*$ -scores (right column) tend to increase at the ends and drop in the middle, i.e., waves are more disordered at the food wells and quasiperiodic during the runs between them.
